# Supplementary material
Source: PubMed Central journal article supplement (PMC7450664)
Supplement: nn0c03085_si_001.pdf [file nn0c03085_si_001.pdf]

## Supporting Information

### **Collagen-Inspired Helical Peptide Co-Assembly Forms a Rigid Hydrogel with Twisted Polyproline II Architecture**

*Moumita Ghosh<sup>1,2</sup>, Santu Bera<sup>1,2</sup>, Sarah Schiffmann<sup>1,2</sup>, Linda J. W. Shimon<sup>3</sup> and Lihi Adler-Abramovich<sup>1,2\*</sup>*

<sup>1</sup>Department of Oral Biology, The Goldschleger School of Dental Medicine, Sackler Faculty of Medicine, Tel-Aviv University, Tel Aviv, 69978, Israel.

<sup>2</sup>The Center for Nanoscience and Nanotechnology, Tel Aviv University, Tel Aviv, 69978, Israel

<sup>3</sup>Department of Chemical Research Support, Weizmann Institute of Science, Rehovot, 7610001, Israel.

\*Correspondence to: [LihiA@tauex.tau.ac.il](mailto:LihiA@tauex.tau.ac.il)

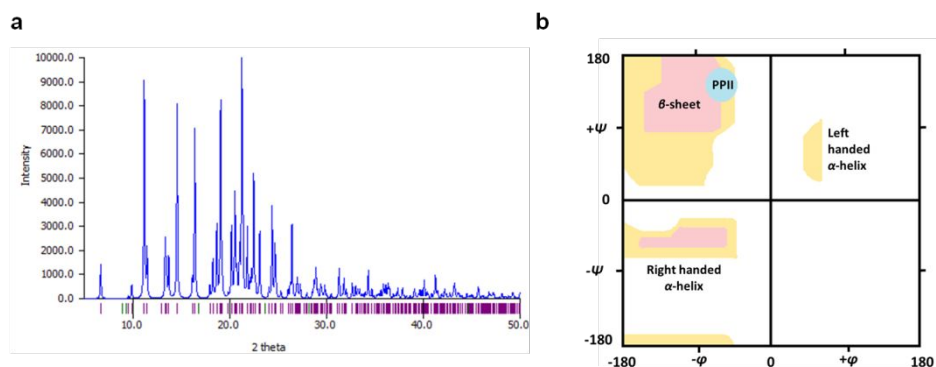

**Figure S1: PXRD and Ramachandran Plot Position of the Fmoc-Gly-Pro-Hyp Crystal.** (a) Single crystal XRD of an Fmoc-Gly-Pro-Hyp crystal obtained in 2:1 MeOH/water solvent mixture. (b) Ramachandran plot of the sterically allowed dihedral angles in the Polyproline II helical conformation (Blue region), which match the dihedral angle found in our Fmoc-Gly-Pro-Hyp crystal single unit.

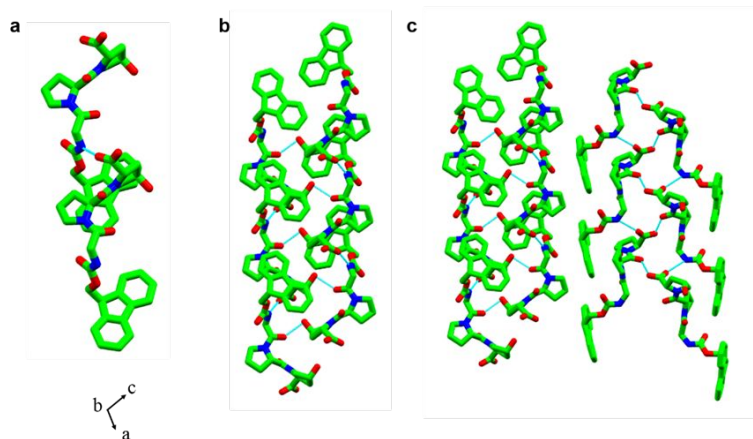

**Figure S2: H-bonding sites of Fmoc-Gly-Pro-Hyp crystal.** Side-by-side H-bond interactions of a single helical chain with two nearby chains in the crystal structure of Fmoc-Gly-Pro-Hyp, showing the H-bonding sites in the crystal structure.

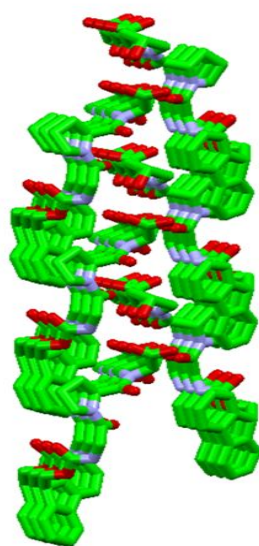

**Figure S3: Trimeric Units of the Crystal Structure of Fmoc-Gly-Pro-Hyp.** Interaction of trimeric units through H-bonds to produce the helical sheets in the crystal structure of Fmoc-Gly-Pro-Hyp.

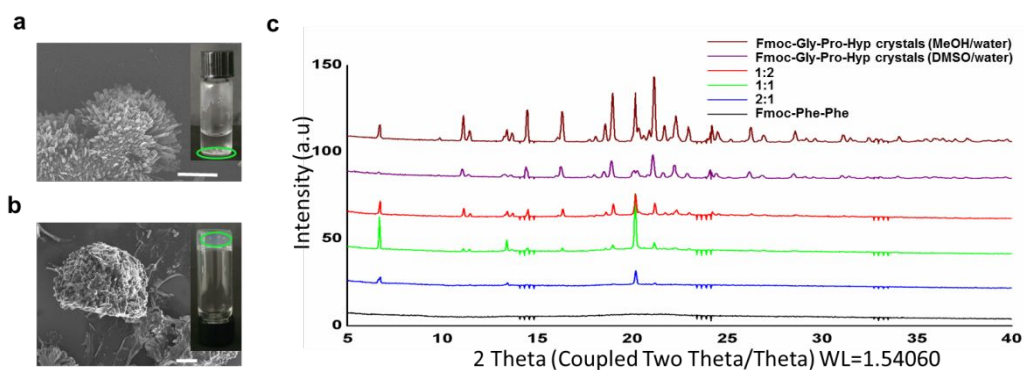

**Figure S4: PXRd characterization of Co-assembly of Fmoc-Phe-Phe and Fmoc-Gly-Pro-Hyp.** (a-b) SEM images of (a) Fmoc-Gly-Pro-Hyp crystals in 5% DMSO in water solvent, (b) Crystals after 5 days in the Fmoc-Phe-Phe:Fmoc-Gly-Pro-Hyp 1:2 hybrid hydrogel sample. Scale bar: 10 μm (c) PXRd characterization of dried Fmoc-Gly-Pro-Hyp in MeOH/water, Fmoc-Gly-Pro-Hyp in DMSO/water, Fmoc-Phe-Phe:Fmoc-Gly-Pro-Hyp 2:1, Fmoc-Phe-Phe:Fmoc-Gly-Pro-Hyp 1:1, Fmoc-Phe-Phe:Fmoc-Gly-Pro-Hyp 1:2 and Fmoc-Phe-Phe hydrogel.

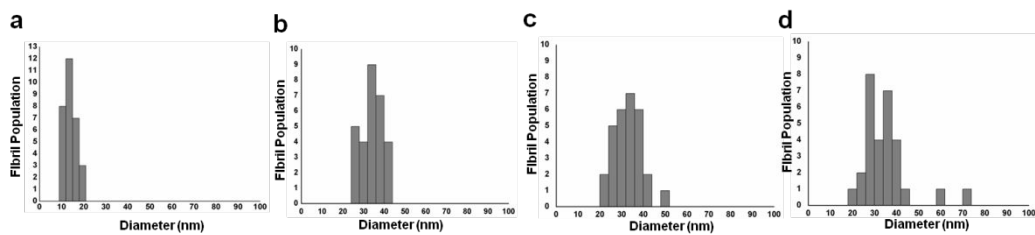

**Figure S5: Hydrogels fibrils diameter determination by histogram plots from AFM image analysis.** (a) FmocFF hydrogel, (b) Fmoc-Phe-Phe:Fmoc-Gly-Pro-Hyp 2:1. (c) Fmoc-Phe-Phe:Fmoc-Gly-Pro-Hyp 1:1. (d) Fmoc-Phe-Phe:Fmoc-Gly-Pro-Hyp 1:2.

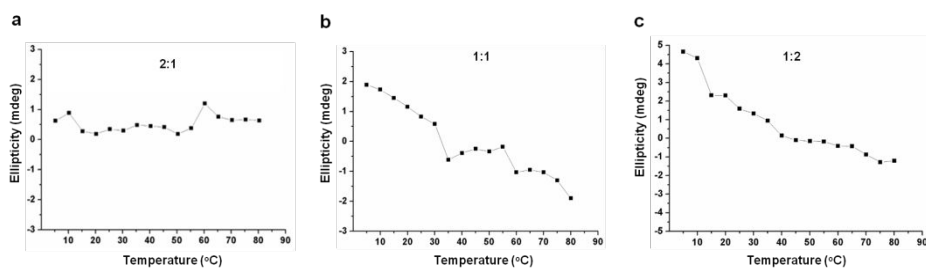

**Figure S6: Thermal Transition of Circular Dichroism Analysis of the 227 nm Positive Peak over a Temperature Scan of 5-90 °C.** (a) Fmoc-Phe-Phe:Fmoc-Gly-Pro-Hyp 2:1. Circular dichroism analysis over a temperature scan of 5-90°C displaying the decrease in the positive peak intensity at 227 nm of (b) Fmoc-Phe-Phe:Fmoc-Gly-Pro-Hyp 1:1, and (c) Fmoc-Phe-Phe:Fmoc-Gly-Pro-Hyp 1:2.

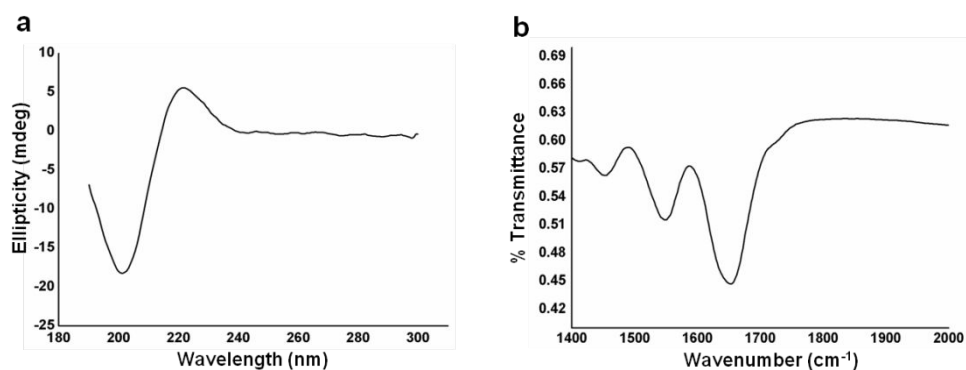

**Figure S7: CD and FTIR Spectrum of Collagen.** (a) CD spectrum of the Collagen. (b) FTIR spectrum of the Collagen.

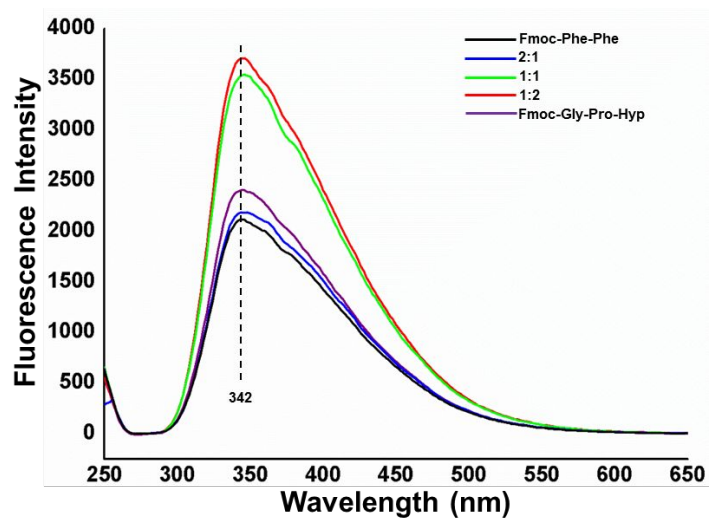

**Figure S8: Fluorescence emission spectra.** Fluorescence emission spectra at 342 nm of the fluorenyl moiety of the multi-component hydrogels of Fmoc-Phe-Phe and Fmoc-Gly-Pro-Hyp after excitation at 280 nm at time point 0 (initiation of gelations).

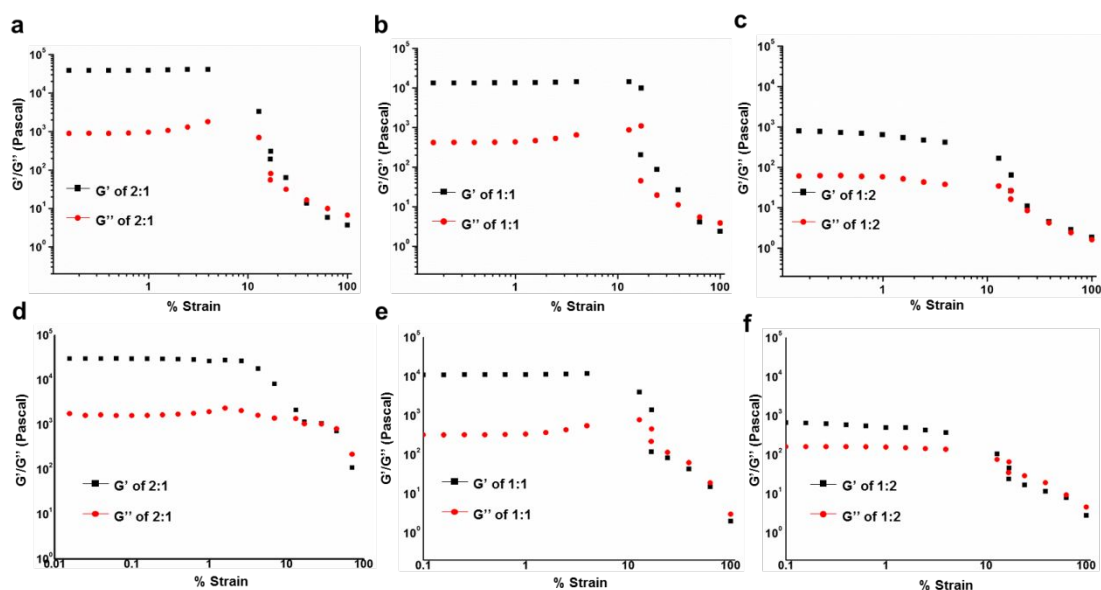

**Figure S9: Rheological Strain Sweep Analyses of the Hybrid Hydrogels.** Rheological strain sweep analyses showing the storage modulus ( $G'$ ) and loss modulus ( $G''$ ). (a, d) Fmoc-Phe-Phe:Fmoc-Gly-Pro-Hyp 2:1, (b, e) Fmoc-Phe-Phe:Fmoc-Gly-Pro-Hyp 1:1, and (c, f) Fmoc-Phe-Phe:Fmoc-Gly-Pro-Hyp 1:2 hybrid hydrogels.

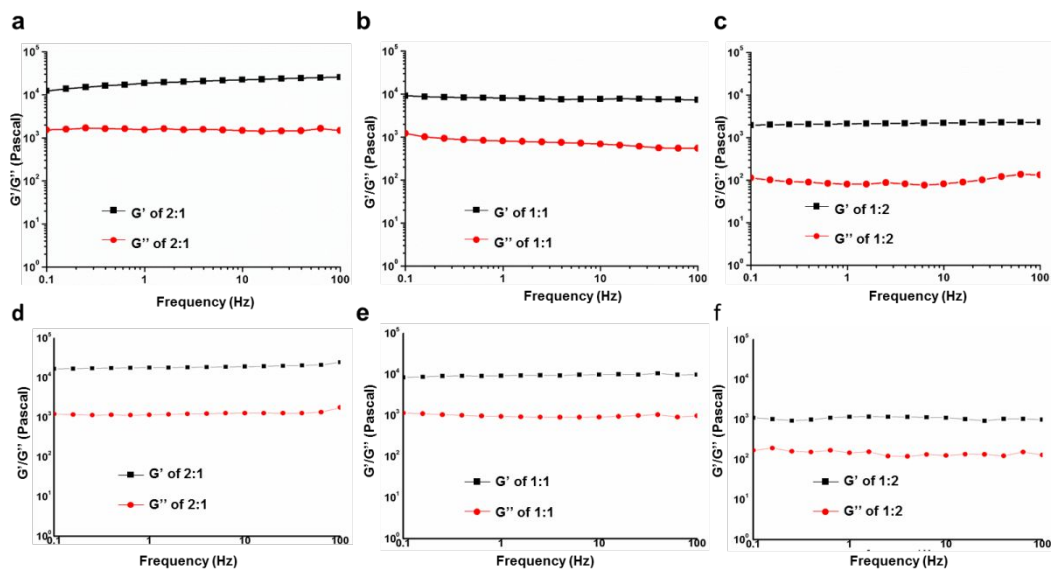

**Figure S10: Rheological Frequency Sweep Analyses of the Hybrid Hydrogels.** Rheological frequency sweep analyses showing the storage modulus ( $G'$ ) and loss modulus ( $G''$ ). (a, d) Fmoc-Phe-Phe:Fmoc-Gly-Pro-Hyp 2:1, (b, e) Fmoc-Phe-Phe:Fmoc-Gly-Pro-Hyp 1:1 and (c, f) Fmoc-Phe-Phe:Fmoc-Gly-Pro-Hyp 1:2 hybrid hydrogels.

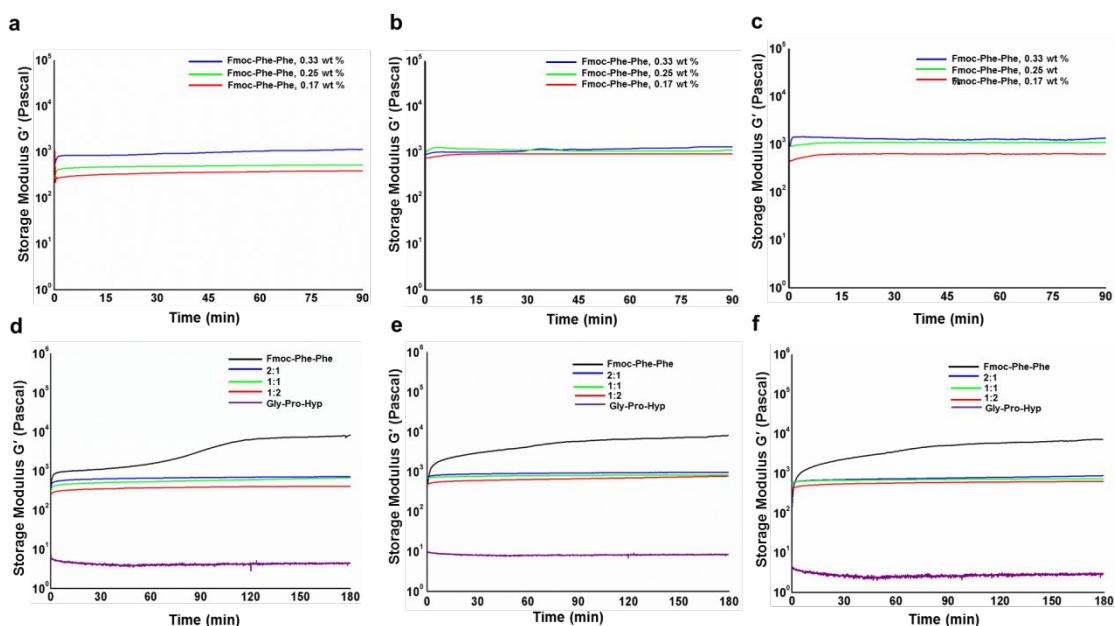

**Figure S11: Rheological Time Sweep Analyses of Pure Fmoc-Phe-Phe and The Hybrid Hydrogels of Fmoc-Phe-Phe And Gly-Pro-Hyp.** *In situ* time sweep oscillation measurements of hydrogel formation (a, b, c) Hydrogels formed by pure Fmoc-Phe-Phe at different concentrations (0.33, 0.25, 0.17 wt %). (d, e, f) Hydrogels formed by Fmoc-Phe-Phe, Fmoc-Phe-Phe:Gly-Pro-Hyp 2:1, Fmoc-Phe-Phe:Gly-Pro-Hyp 1:1, Fmoc-Phe-Phe:Gly-Pro-Hyp 1:2, and Gly-Pro-Hyp.

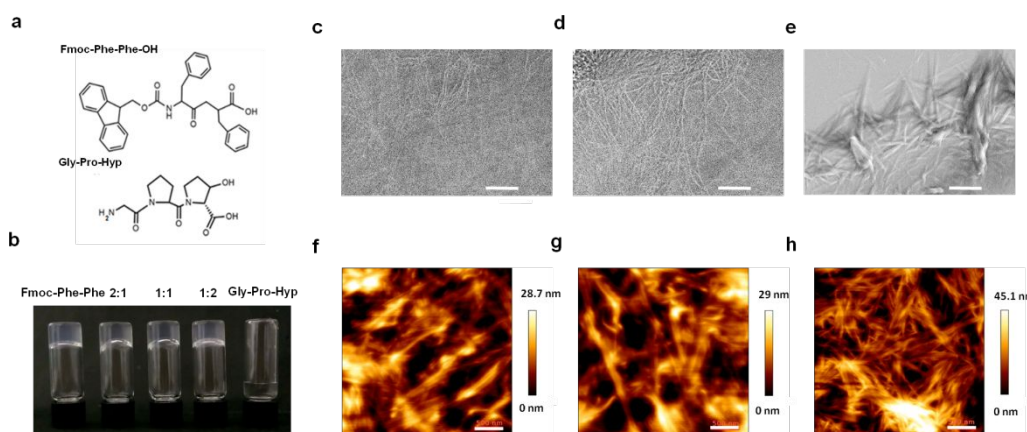

**Figure S12: Co-Assembled Hydrogel of Fmoc-Phe-Phe and Gly-Pro-Hyp.** (a) Molecular structure of the two building blocks, Fmoc-Phe-Phe and Gly-Pro-Hyp. (b) Inverted vials of the single and hybrid hydrogels. (c-e) SEM images of the studied hydrogels. Scale bar: 10  $\mu$ m. (f-h) AFM images of the studied hybrid hydrogels. Scale bar: 500 nm. (c, f) Fmoc-Phe-Phe:Gly-Pro-Hyp 2:1. (d, g) Fmoc-Phe-Phe:Gly-Pro-Hyp 1:1. (e, h) Fmoc-Phe-Phe:Gly-Pro-Hyp 1:2.

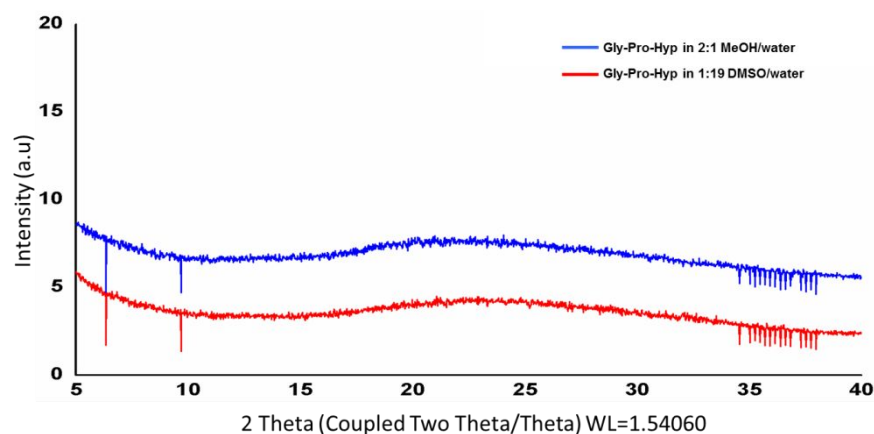

**Figure S13: PXRD Characterization of Dried Gly-Pro-Hyp.** PXRD characterization of dried Gly-Pro-Hyp in 2:1 MeOH/water and 1:19 DMSO/water solvent as indicated, showing no crystalline peak.

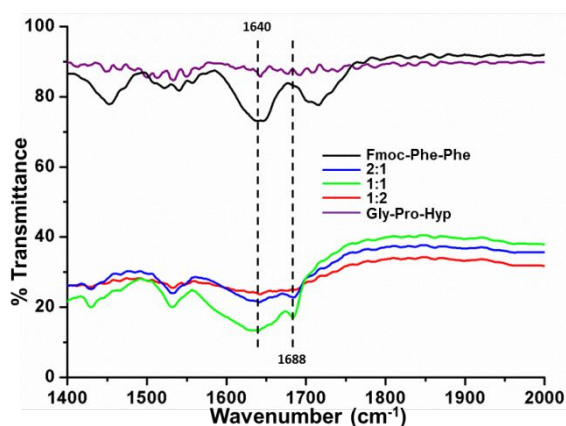

**Figure S14: FTIR Spectra of the Hybrid Hydrogels Formed by Fmoc-Phe-Phe and Gly-Pro-Hyp.** FTIR spectra of the hydrogels formed by Fmoc-Phe-Phe, Fmoc-Phe-Phe:Gly-Pro-Hyp 2:1, Fmoc-Phe-Phe:Gly-Pro-Hyp 1:1, Fmoc-Phe-Phe:Gly-Pro-Hyp 1:2, and Gly-Pro-Hyp displaying a  $\beta$ -sheet rich structure.



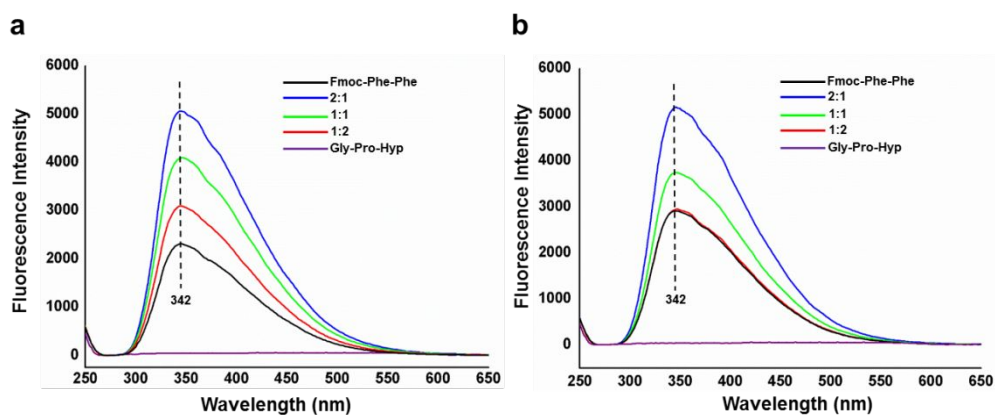

**Figure S15: Fluorescence Emission Spectra.** Fluorescence emission spectra at 342 nm of the fluorenyl moiety of the multi-component hydrogels of Fmoc-Phe-Phe and Gly-Pro-Hyp under excitation of 280 nm at (a) time point 0 and (b) 3 hours after gel formation showing no peak shift.

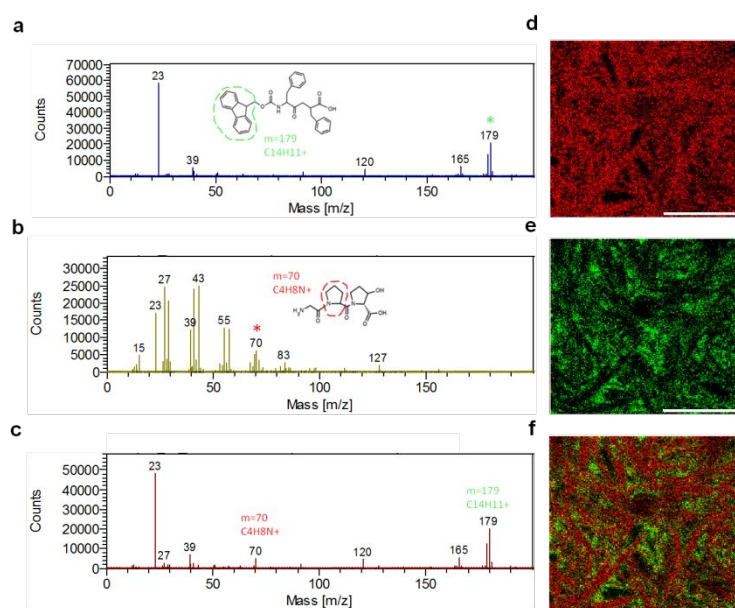

**Figure S16: ToF-SIMS Analysis of the Chemical Composition of the Fmoc-Phe-Phe:Gly-Pro-Hyp 1:1 Hybrid Hydrogel.** (a-c) ToF-SIMS Mass spectrometry analysis. (d-f) Chemical ion maps. (a, d) Fmoc-Phe-Phe, (b, e) Gly-Pro-Hyp, (c, f) Fmoc-Phe-Phe:Gly-Pro-Hyp 1:1 hybrid hydrogel. Figure f represents a merged image of d and e. Scale bar represents 10  $\mu\text{m}$ .

| Complex                                     | <b>Fmoc-Gly-Pro-Hyp</b>                                       |
|---------------------------------------------|---------------------------------------------------------------|
| CCDC Deposition #                           | 1962894                                                       |
| Formula                                     | C <sub>27</sub> H <sub>29</sub> N <sub>3</sub> O <sub>7</sub> |
| Crystal description                         | colorless tablet                                              |
| Crystal size, [mm <sup>3</sup> ]            | 0.03 x 0.073 x 0.161                                          |
| FW, [g mol <sup>-1</sup> ]                  | 507.53                                                        |
| Space group                                 | <i>P2<sub>1</sub>2<sub>1</sub>2<sub>1</sub></i>               |
| Crystal system                              | Orthorhombic                                                  |
| a, [Å]                                      | 9.4887(1)                                                     |
| b, [Å]                                      | 9.8639(1)                                                     |
| c, [Å]                                      | 26.3497(2)                                                    |
| α, [°]                                      | 90                                                            |
| β, [°]                                      | 90                                                            |
| γ, [°]                                      | 90                                                            |
| Cell volume, [Å <sup>3</sup> ]              | 2466.22(4)                                                    |
| Z                                           | 4                                                             |
| ρ <sub>caclcd</sub> , [g cm <sup>-3</sup> ] | 1.367                                                         |
| μ, [mm <sup>-1</sup> ]                      | 0.826                                                         |
| No. of reflections                          | 27983                                                         |
| No. of unique reflections                   | 5348                                                          |
| 2Θ <sub>max</sub> , [°]; completeness %     | 67.68; 99.9                                                   |
| R <sub>int</sub>                            | 0.0347                                                        |
| No. of parameters (restraints)              | 336(0)                                                        |
| Final R <sup>a</sup> , wR2                  | 0.0308, 0.0769                                                |
| Final R <sup>b</sup> , wR2                  | 0.0313, 0.0773                                                |
| GooF                                        | 1.043                                                         |
|                                             |                                                               |

**Table S1.** Crystallographic data of Fmoc-Gly-Pro-Hyp.

<sup>a</sup> for data with  $I > 2\sigma(I)$ . <sup>b</sup> for all data.
